# Supplementary material
Source: publisher site journal article supplement (https://www.dovepress.com/article/480979)
Supplement: Supplementary file 1 [file get_supplementary_file.php]

**Graphene Oxide Quantum Dots-Preactivated Dental Pulp Stem Cells/GelMA Facilitates Mitophagy-Driven Bone Regeneration**

Xiaoyuan Yan1, Na An2, Zeying Zhang1, Qiujing Qiu1, Di Yang1, Penggong Wei1, Xiyue Zhang1, Lihong Qiu1, *, Jiajie Guo1, *

1 Department of Endodontics, School and Hospital of Stomatology, China Medical University, Liaoning Provincial Key Laboratory of Oral Diseases, Shenyang 110002, China

2 Department of Orthodontics, School and Hospital of Stomatology, China Medical University, Liaoning Provincial Key Laboratory of Oral Diseases, Shenyang 110002, China

*Correspondence to:

Professor Lihong Qiu, DDS, PhD

Department of Endodontics, School and Hospital of Stomatology, China Medical University, Liaoning Provincial Key Laboratory of Oral Diseases, Shenyang 110002, China.

No. 117 Nanjing North Street, Heping District, Shenyang, Liaoning Province, China

Email: [lhqiu@cmu.edu.cn](mailto:lhqiu@cmu.edu.cn)

and

Professor Jiajie Guo, DDS, PhD

Department of Endodontics, School and Hospital of Stomatology, China Medical University, Liaoning Provincial Key Laboratory of Oral Diseases, Shenyang 110002, China.

No. 117 Nanjing North Street, Heping District, Shenyang, Liaoning Province, China

Email: [guojiajie@cmu.edu.cn](mailto:guojiajie@cmu.edu.cn)


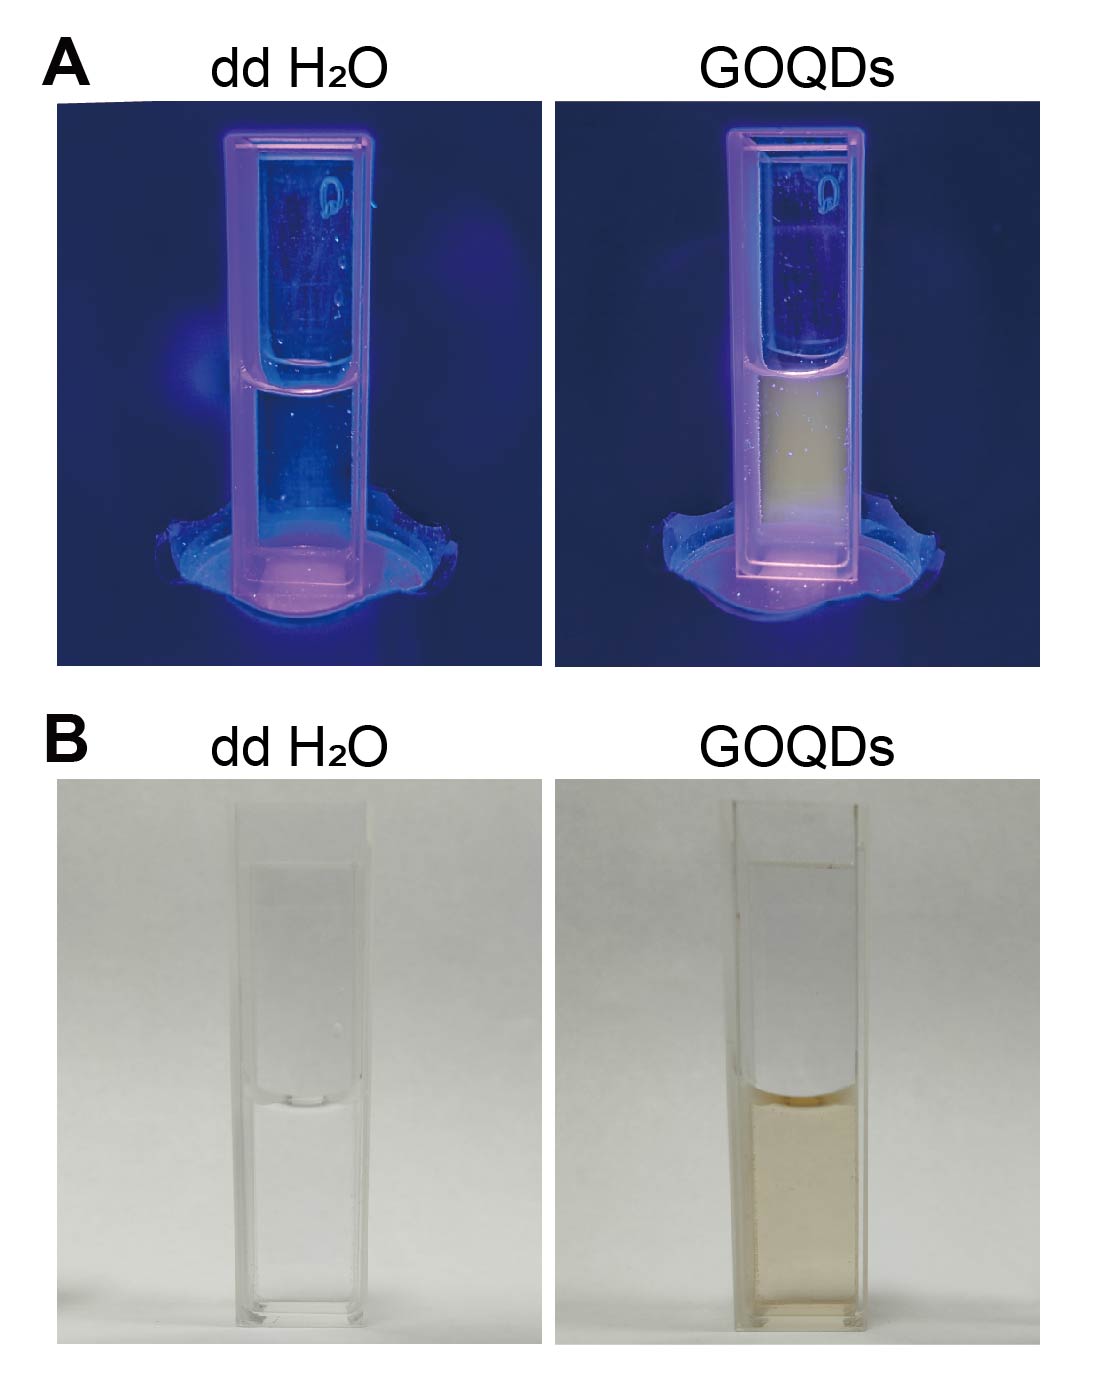
**Figure S1.** Dispersibility and fluorescence of GOQDs aqueous solution. Digital photographs of GOQDs aqueous solution (50 μg/mL) under (**A**) 405-nm UV light and (**B**) daylight with deionized water as the control group.

**Figure S2.**
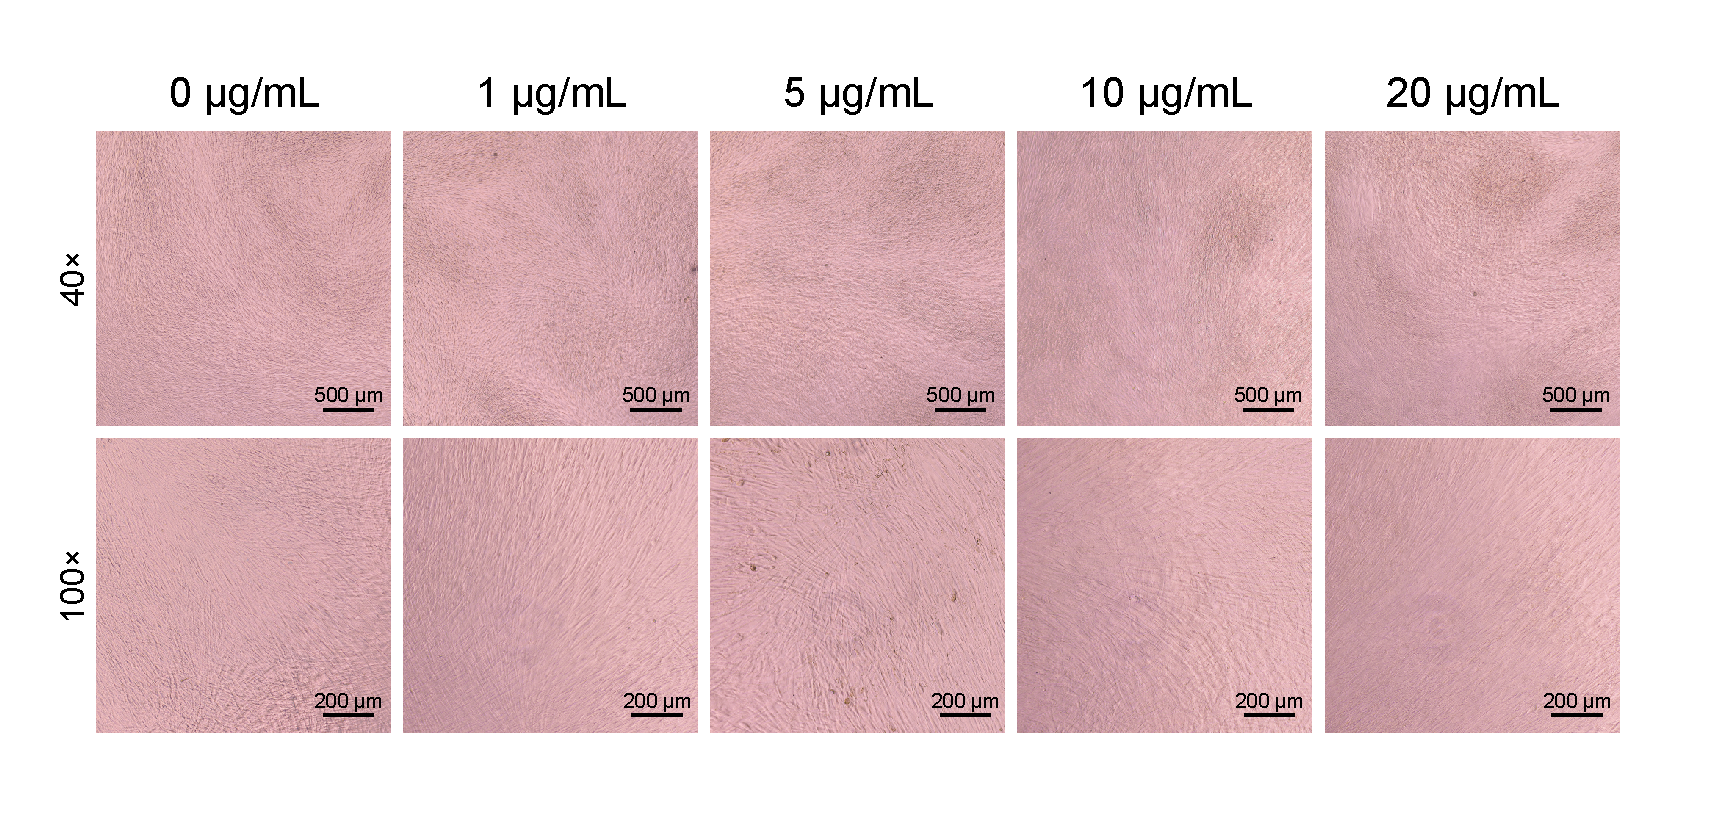
 Images of DPSCs treated with different concentrations of GOQDs for 7 days taken with a microscope (scale bar of the upper panel = 500 μm; scale bar of the lower panel = 200 μm).


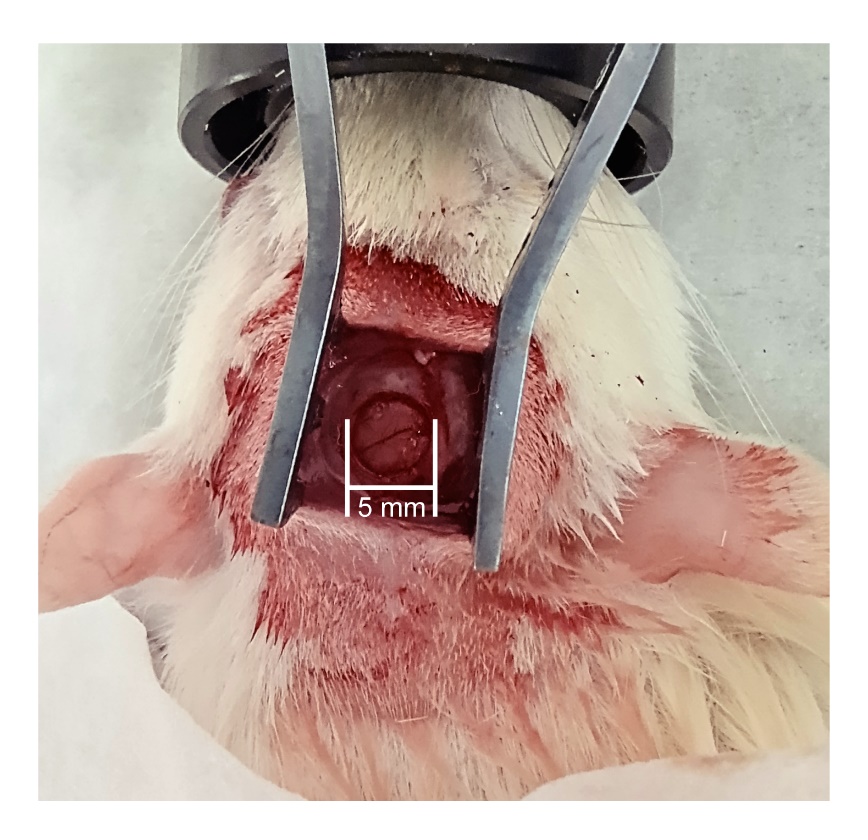
**Figure S3.** Creation of the calvarial bone defect in a rat (diameter = 5 mm).
